# Supplementary material for: The active role of Ca2+ ions in Aβ-mediated membrane damage
Source: Royal Society of Chemistry journal article supplement (doi:10.1039/c8cc01132j), 2018-01-01
Supplement: c8cc01132j1.pdf [file c8cc01132j1.pdf]

## **The active role of Ca<sup>2+</sup> ions in A $\beta$ -mediated membrane damage.**

Michele F.M. Sciacca<sup>a</sup>, Irene Monaco<sup>a</sup>, Carmelo La Rosa<sup>b\*</sup>, Danilo Milardi<sup>a\*</sup>

Supporting Information

## Experimental details

*Materials.* A $\beta_{1-40}$  was purchased from Genscript (Bubendorf, Switzerland) with a purity >98%. Brain total lipid extract (TLBE) was purchased from Avanti Polar lipids Inc. (Alabaster, AL). 4-(2-Hydroxyethyl)-piperazine-1-ethanesulfonic acid sodium salt (HEPES), 6-carboxyfluorescein, Thioflavin T (ThT), Calcium chloride anhydrous (CaCl<sub>2</sub>), 1,1,1,3,3,3-hexa-fluoro-2-propanol (HFIP) and Fura-2 dye potassium salt were purchased from Sigma-Aldrich (St.Louis, MO) with a purity of 99%. Mouse monoclonal anti A $\beta_{1-16}$  (6E10) was purchased by Covance (Princeton, NJ). Secondary goat anti-mouse labeled with IRDye 800 was purchased by Li-COR Biosciences (Lincoln, NE).

*Preparation of model membranes.* In this study, we used large unilamellar vesicles (LUVs) composed of TLBE. Briefly, aliquots of lipid stock solutions in chloroform were dried by using a stream of dry nitrogen gas and evaporated under high vacuum in a round-bottomed flask. Multilamellar vesicles (MLVs), were obtained by hydrating the lipidic film with an appropriate amount of HEPES buffer (10 mM buffer, 100 mM NaCl, pH =7.4) and dispersing by vigorous stirring in a water bath at room temperature. LUVs were obtained by extruding MLVs through polycarbonate filters (pore size = 100 nm, Nuclepore, Pleasanton, CA) mounted in a mini-extruder (Avestin, Ottawa, ON, Canada) fitted with two 0.5 ml Hamilton gastight syringes (Hamilton, Reno, NV). Samples were typically subjected to 23 passes through two filters in tandem.

*A $\beta_{1-40}$  preparation.* To prevent the presence of any preformed aggregates, A $\beta_{1-40}$  was initially dissolved in HFIP at a concentration of 1 mg/ml and then lyophilized overnight. To be used for the experiments, the lyophilized powder was initially dissolved in NaOH 1 mM to obtain a stock solution with a final concentration of 250  $\mu$ M. Each stock solution of A $\beta_{1-40}$  was used immediately after preparation.

*CD spectra.* Circular dichroism spectra were acquired by a JASCO spectrophotometer. Samples were prepared by dissolving A $\beta_{1-40}$  in NaOH 1 mM and then added to HEPES buffer 10 mM, pH 7.4, NaF 0.1 M to obtain a final concentration of 1  $\mu$ M.

*ThT measurements.* Kinetics of amyloid formation was measured using the well-known and widely accepted Thioflavin T (ThT) assay. Samples were prepared by adding 1  $\mu$ L of the 250  $\mu$ M NaOH peptide stock solution to 100  $\mu$ L of 10 mM HEPES buffer solution (pH 7.4, 100 mM NaCl, containing 10  $\mu$ M ThT) and by adding the opportune amount of Ca<sup>2+</sup> ions. For experiments in

presence of model membrane, samples were prepared by adding 1  $\mu\text{L}$  of the 250  $\mu\text{M}$  NaOH peptide stock solution to 100  $\mu\text{L}$  of 200  $\mu\text{M}$  LUV solution (in 10 mM HEPES buffer pH 7.4, 100 mM NaCl, containing 10  $\mu\text{M}$  ThT) and by adding the opportune amount of  $\text{Ca}^{2+}$  ions. Experiments were carried out in Corning 96 well non-binding surface plates. Time traces were recorded using a Varioskan (ThermoFisher, Walham, MA) plate reader using a  $\lambda_{\text{exc}}$  of 440 nm and a  $\lambda_{\text{em}}$  of 485 nm at 25  $^{\circ}\text{C}$ , shaking the samples for 10 seconds before each read. To obtain the kinetics parameters relative to the ThT assay reported in table 1 and 2 we fitted the data obtained by three independent measurements with the equation:

$$\text{ThT fluorescence} = \frac{\text{ThT}_{\text{max}}}{1 + e^{-k(t - t_{1/2})}}$$

In this equation  $\text{ThT}_{\text{max}}$  is the maximum value of the ThT signal, which is qualitatively correlated with the amount of fiber formed;  $t_{1/2}$  is the time to half which is defined as the time the signal needs to reach 50 % of the maximum;  $k$  is the apparent fiber growth rate.

*Membrane leakage experiments.* Membrane leakage experiments were performed by measuring the leakage of 6-carboxyfluorescein dye from LUVs. Dye-filled LUVs were prepared by hydrating the dry lipid film with the buffer solution containing 6-carboxyfluorescein (70 mM 6-carboxyfluorescein, pH=7.4) according to the procedure described above. To remove non encapsulated 6-carboxyfluorescein we placed the solution containing LUVs on a Sephadex G50 gel exclusion column (Sigma-Aldrich, St. Louis, MO) and eluted using the buffer solution. The final concentration of lipids was checked by using the Stewart. Membrane damage was quantified by the increase in fluorescence emission intensity of 6-carboxyfluorescein due to its dilution (dequenching) in buffer as a consequence of the membrane leakage.

*Fura 2 experiments.*

We detected the presence of pores by measuring changes in the 340:380 nm excitation ratio upon binding of  $\text{Ca}^{2+}$  to the cation-sensitive dye Fura-2 encapsulated within the LUVs. Samples were prepared by first diluting the Fura-2 dye-filled vesicles solution with buffer solution (10 mM Hepes buffer solution, 100mM Fura-2 pentapotassium salt, 100 mM NaCl, pH 7.4; to prevent the formation of solid calcium phosphate, phosphate buffer was not used) to a final concentration of 0.2 mg/ml. Then,  $\text{A}\beta$ 1-40 was added with a final concentration of 10  $\mu\text{M}$ . Fluorescence was measured at 340 and 380 nm with slits set for 10 nm bandwidths to obtain the baseline. After 10 min,  $\text{A}\beta$  were added to the sample, and changes in the 340:380 ratio were recorded.

*Western Blot experiments.* Western blotting analysis for  $A\beta$  aggregation in the presence and absence of  $Ca^{2+}$  ions was performed on samples at several time of incubation at 37 °C. Samples were loaded onto 4-12% Bis-Tris gel, (Invitrogen). After separation (160 V), proteins were transferred onto a nitrocellulose membrane. Membranes were blotted at 4°C O/N with the primary antibody mouse monoclonal anti  $A\beta$  1-16 (6E10). Secondary goat anti-mouse labeled with IRDye 800 (1:25.000 Li-COR Biosciences) were used at room temperature for 45 min. Hybridization signals were detected with the Odyssey Infrared Imaging System (LI-COR Biosciences).

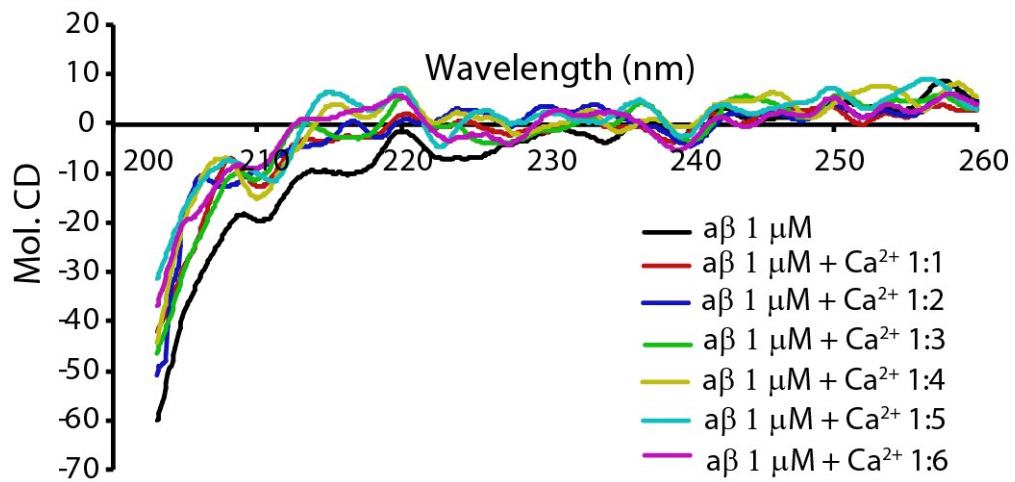

**Figure S1. Effect of calcium ions on Aβ<sub>1-40</sub> secondary structure.** Circular dichroism spectra of samples containing 1 mM Aβ<sub>1-40</sub> at the indicated concentration of calcium ions. All experiments were conducted at 25°C in HEPES buffer 10 mM, pH 7.4, NaF 0.1 M.

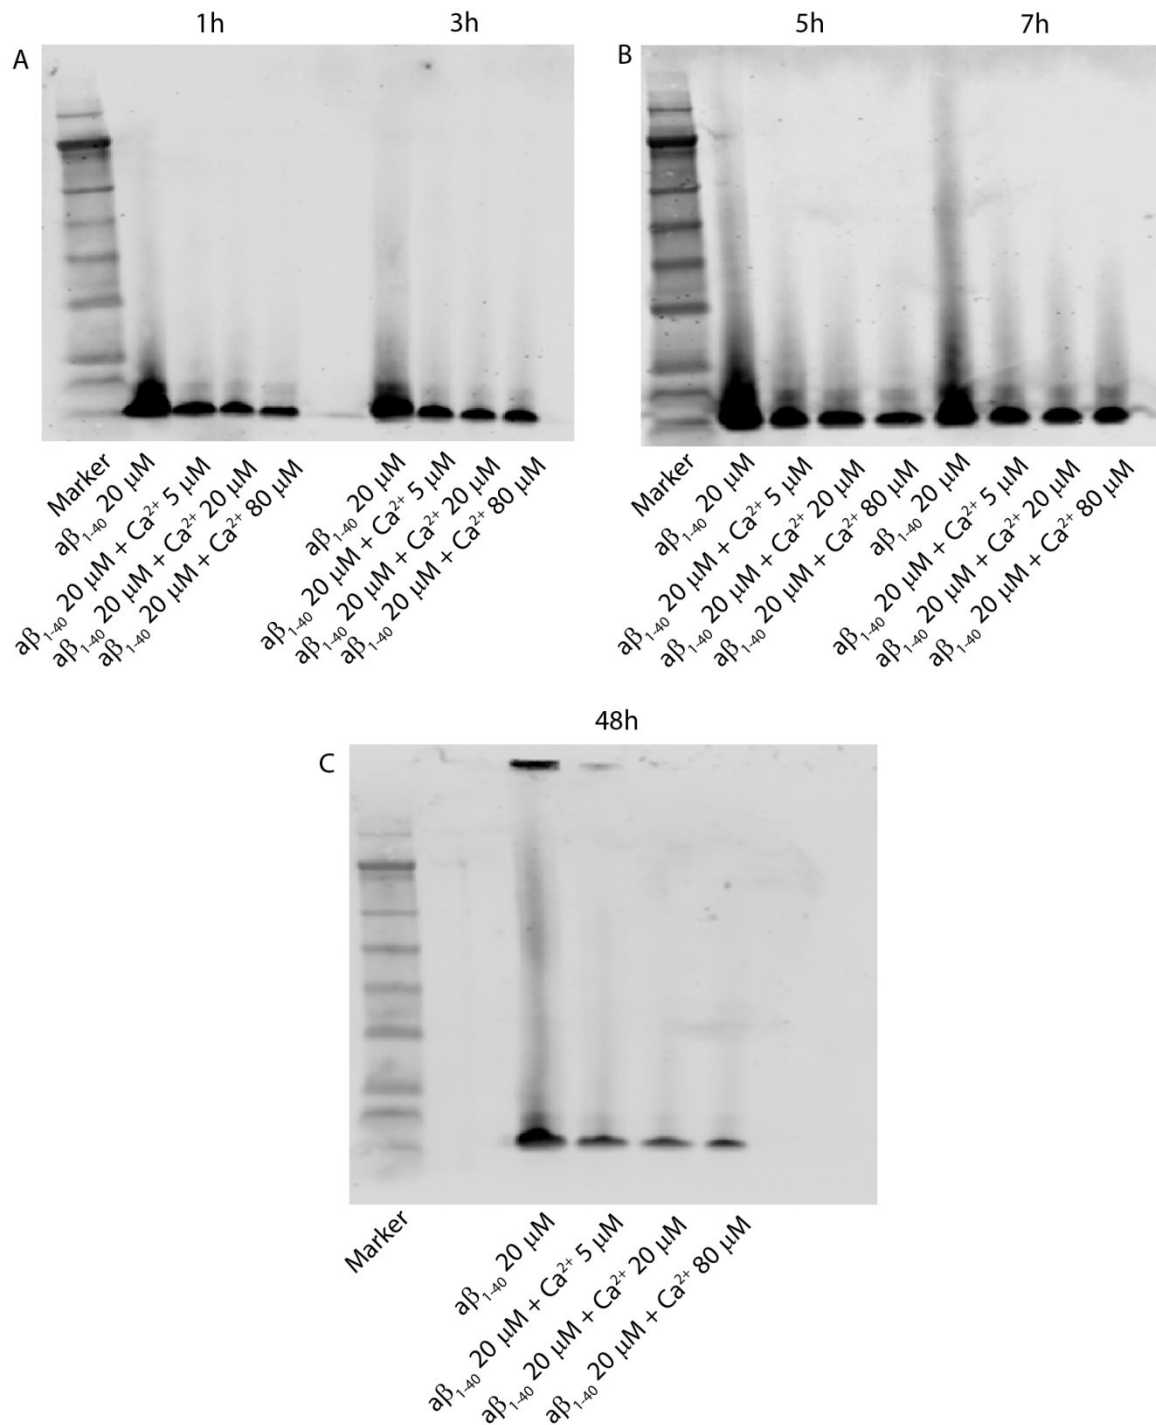

**Figure S2. Western Blot analysis of Aβ<sub>1-40</sub> in the presence of increasing amount of Ca<sup>2+</sup> ions.** Panel A) Western Blot analysis for sample containing Aβ<sub>1-40</sub> 20 μM and the indicated amount of Ca<sup>2+</sup> ions after 1h and 3h incubation at 37°C; Panel B) after 5h and 7h incubation at 37°C; Panel C) after 48h incubation at 37°C.

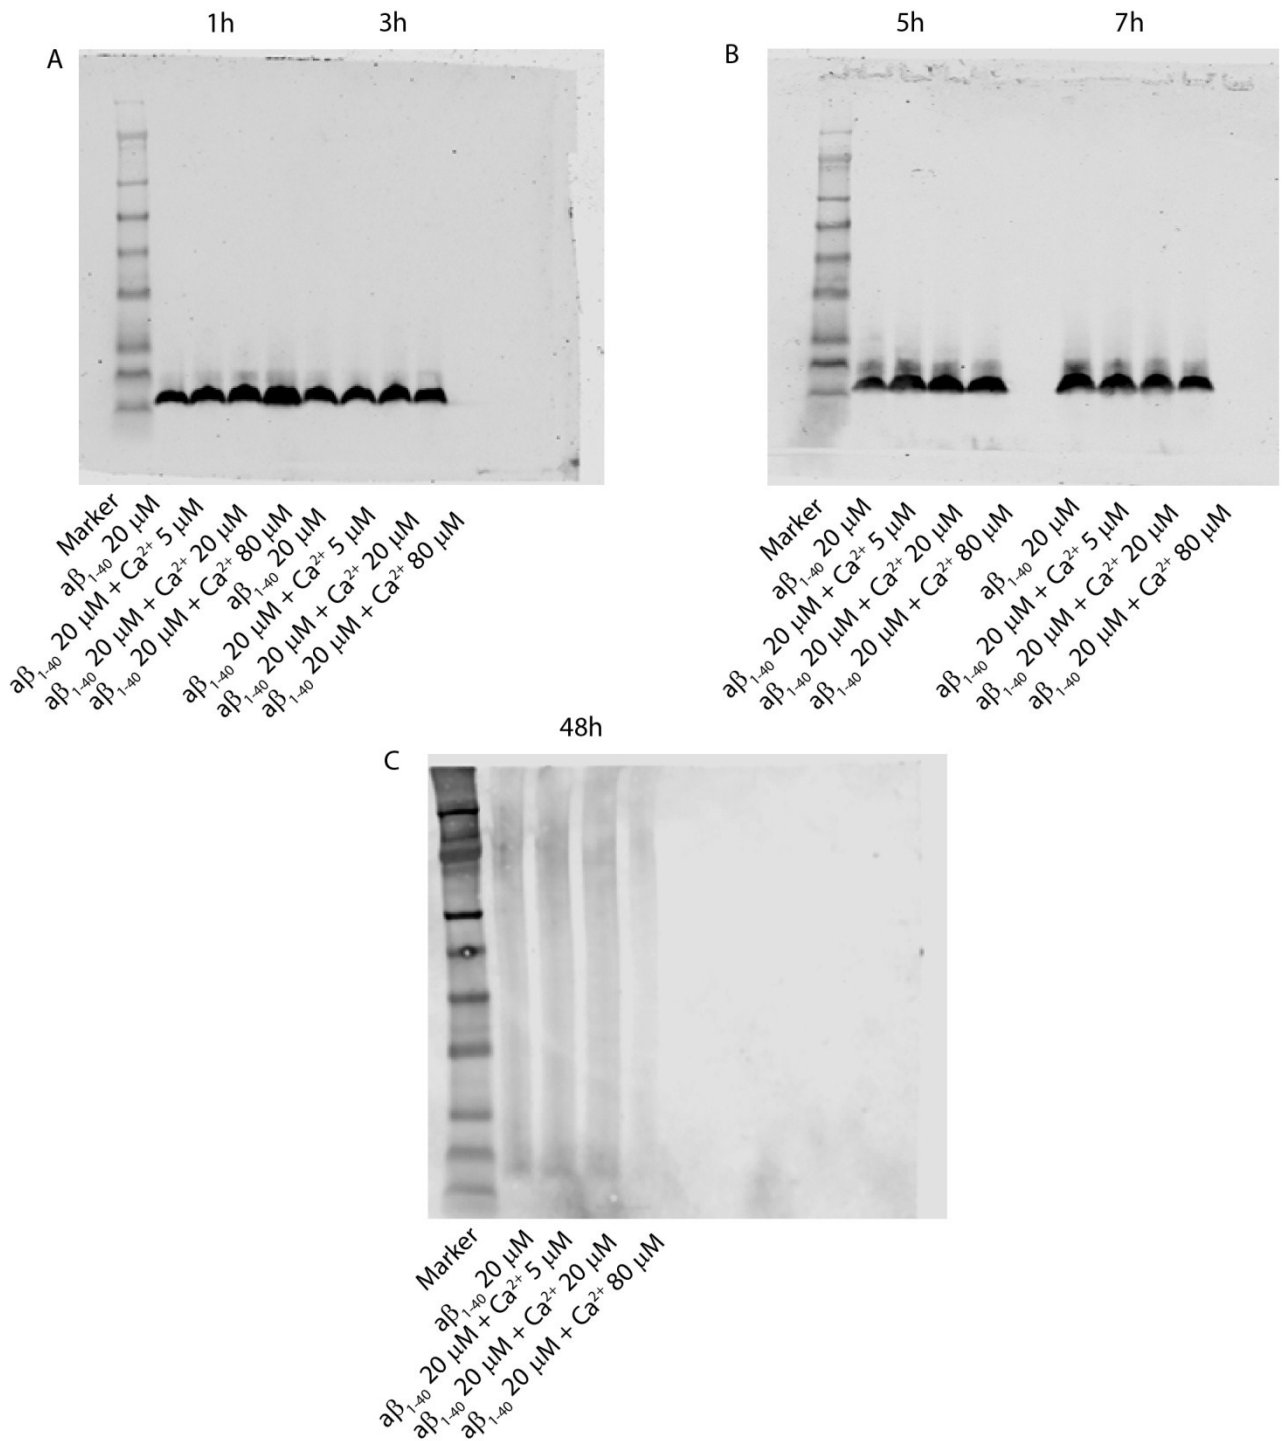

**Figure S3. Western Blot analysis of Aβ<sub>1-40</sub> in the presence LUV TLBE and an increasing amount of Ca<sup>2+</sup> ions.** Panel A) Western Blot analysis for sample containing 200 μM LUV TLBE, Aβ<sub>1-40</sub> 20 μM and the indicated amount of Ca<sup>2+</sup> ions after 1h and 3h incubation at 37°C; Panel B) after 5h and 7h incubation at 37°C; Panel C) after 48h incubation at 37°C.
